# Supplementary material
Source: PubMed Central journal article supplement (PMC4561699)
Supplement: AEM.01382-15_zam999116621so1.pdf [file AEM.01382-15_zam999116621so1.pdf]

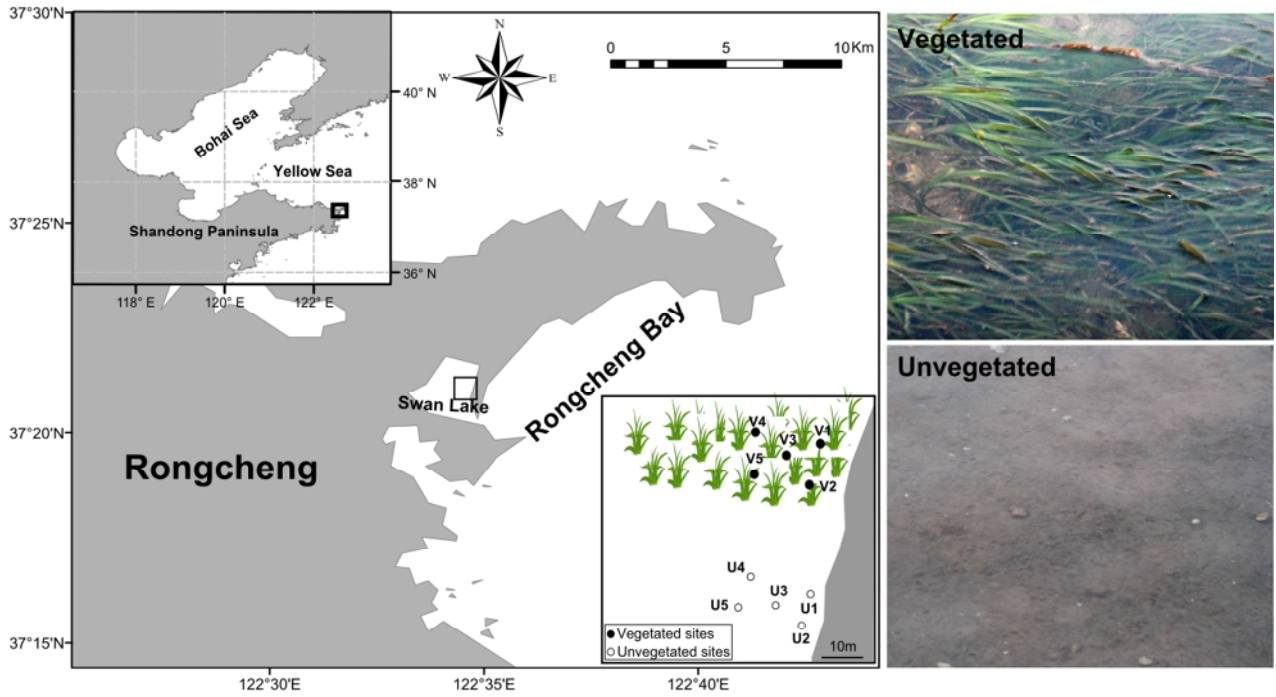

**Figure S1.** A map and photographs showing the sampling sites colonized with the eelgrass *Zostera marina* and the unvegetated sites in the shallow lagoon of Swan Lake, the Yellow Sea, Northern China.

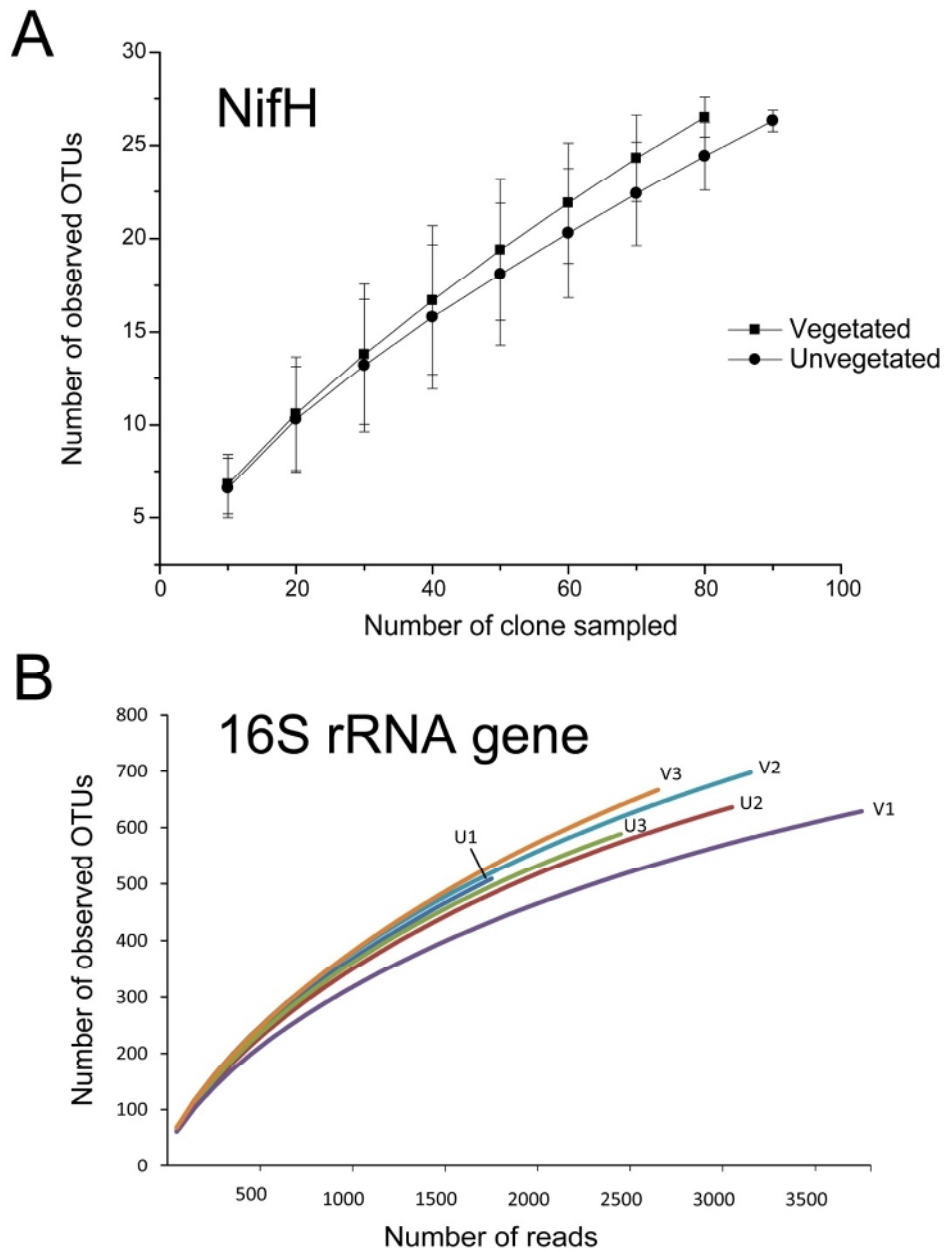

**Figure S2.** Rarefaction curves of the numbers of observed NifH OTUs (cutoff = 5% dissimilarity) based on clone libraries (A) and bacterial 16S rRNA gene OTUs (cutoff = 3% dissimilarity) based on Ion Torrent sequencing dataset (B) of vegetated (V1-3) and unvegetated (U1-3) sediment samples.

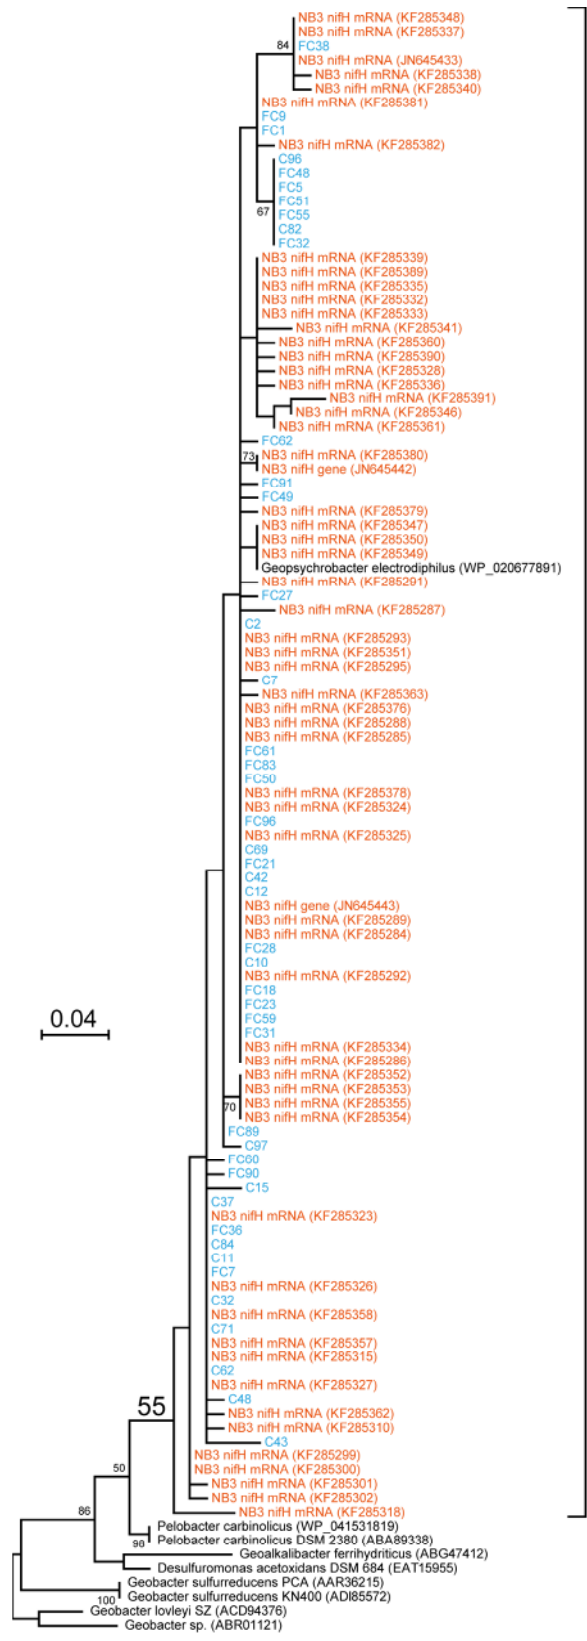

NifH OTU from the Swan Lake: SL1  
 = NB3 (originally defined by Fulweiler et al. 2013)  
 = *Geopsychrobacter*-related (*Geobacteraceae*)  
 NifH phylotypes

**Figure S3.** A maximum likelihood tree based on NifH protein sequences showing that SL1 sequences obtained in this study (in blue) and NB3 sequences (in orange) from Brown and Jenkins (2014) represent the same clade in which *Geopsychrobacter electrodiphilus* is included. Bootstrap values lower than 50% are not shown. The scale bar indicates 4 changes per 100 amino acids.

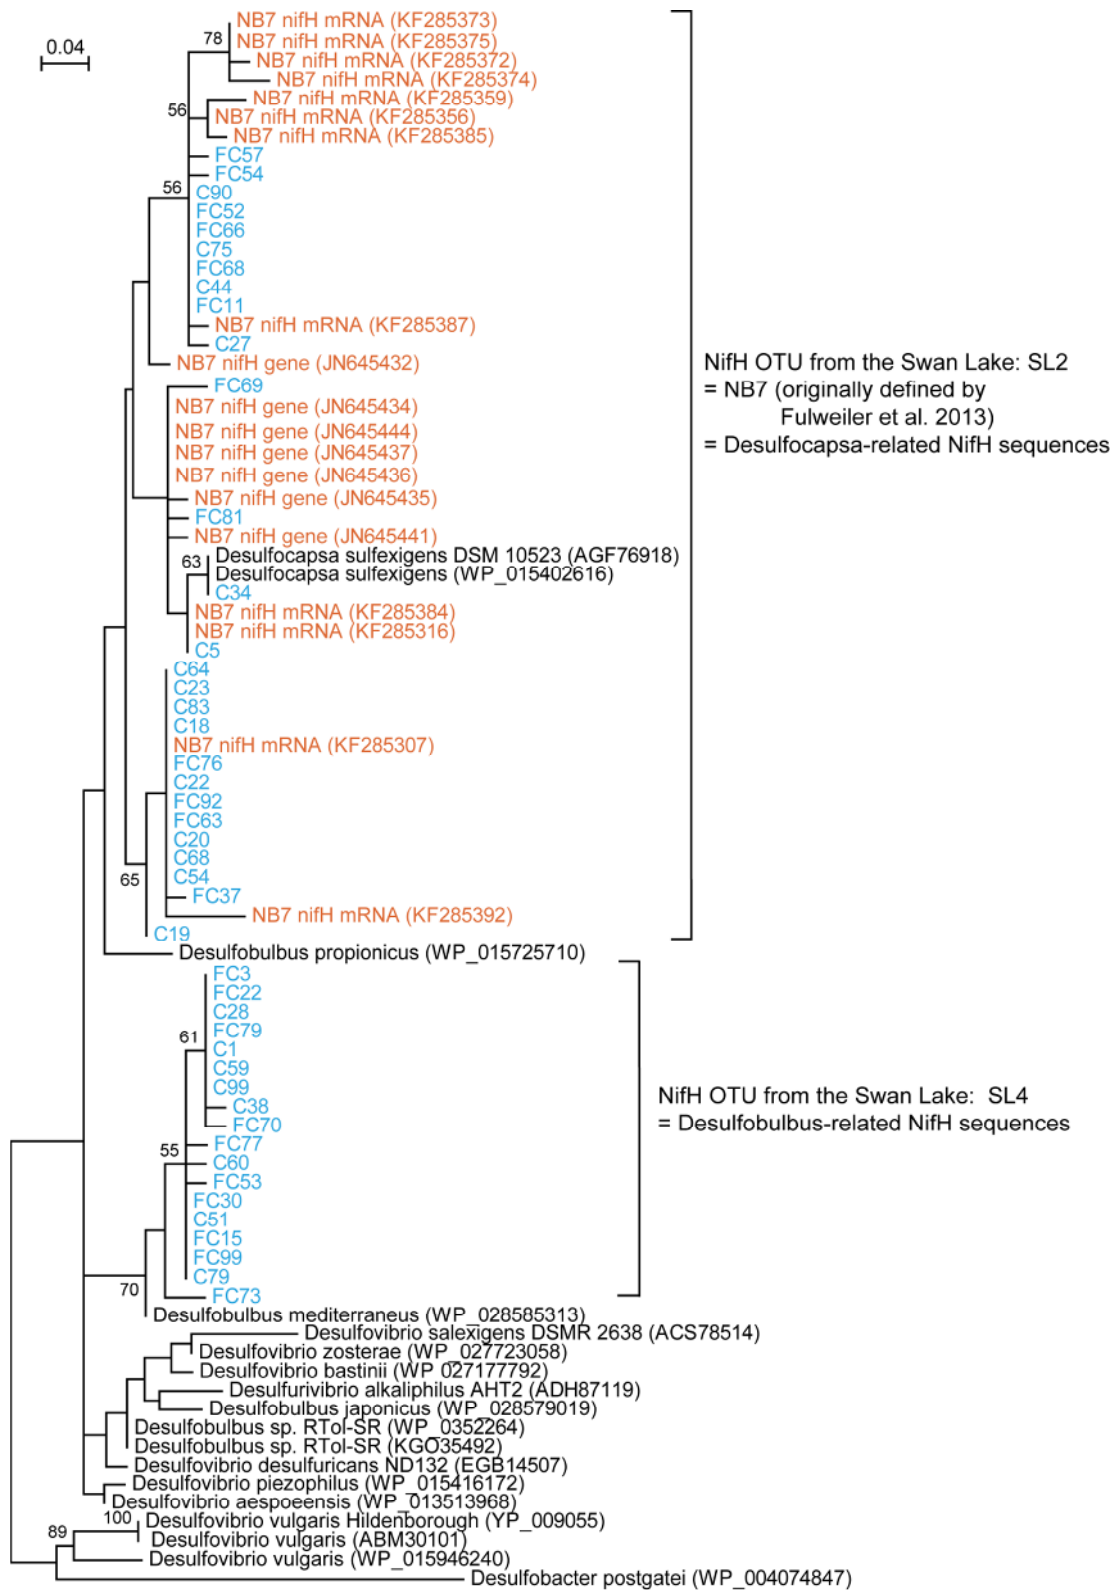

**Figure S4.** A maximum likelihood tree based on NifH protein sequences showing that SL2 sequences obtained in this study (in blue) cluster well with NB7 sequences (in orange) from Brown and Jenkins (2014), forming a clade that contains a cultured representative, *Desulfocapsa sulfexigens*. Bootstrap values lower than 50% are not shown. The scale bar indicates 4 changes per 100 amino acids.



**Table S1.** Environmental variables at sites vegetated with *Z. marina* and those unvegetated in the Swan Lake

| Environmental variable                     | Vegetated site |        |        |        |        |        | Unvegetated site |        |        |        |        |        | P               |
|--------------------------------------------|----------------|--------|--------|--------|--------|--------|------------------|--------|--------|--------|--------|--------|-----------------|
|                                            | V1             | V2     | V3     | V4     | V5     | Mean   | U1               | U2     | U3     | U4     | U5     | Mean   |                 |
| <b>Overlying water</b>                     |                |        |        |        |        |        |                  |        |        |        |        |        |                 |
| Dissolved oxygen (mg L <sup>-1</sup> )     | 8.28           | 8.31   | 8.28   | 8.00   | 7.75   | 8.1    | 7.83             | 8.27   | 7.9    | 8.19   | 8.23   | 8.1    | 0.79            |
| Salinity (PSU)                             | 31.22          | 31.27  | 31.25  | 31.24  | 31.24  | 31.2   | 31.23            | 31.19  | 31.22  | 31.31  | 31.48  | 31.3   | 0.45            |
| Temperature (°C)                           | 15.58          | 15.50  | 15.54  | 15.5   | 15.48  | 15.5   | 15.49            | 15.58  | 15.32  | 14.68  | 14.17  | 15.1   | 0.12            |
| Chlorophyll <i>a</i> (µg L <sup>-1</sup> ) | 11.97          | 12.03  | 12.1   | 12.11  | 12.05  | 12.1   | 5.13             | 4.94   | 5.18   | 4.93   | 4.98   | 5.0    | <b>&lt;0.01</b> |
| pH                                         | 8.23           | 8.23   | 8.23   | 8.22   | 8.20   | 8.22   | 8.21             | 8.23   | 8.2    | 8.08   | 8.09   | 8.16   | 0.10            |
| <b>Sediment pore water</b>                 |                |        |        |        |        |        |                  |        |        |        |        |        |                 |
| NO <sub>3</sub> <sup>-</sup> -N (µM)       | 33.06          | 46.07  | 28.047 | 32.69  | 39.64  | 35.9   | 68.69            | 20.70  | 34.56  | 18.36  | 23.41  | 33.1   | 0.79            |
| NO <sub>2</sub> <sup>-</sup> -N (µM)       | 0.56           | 0.52   | 1.27   | 0.46   | 1.37   | 0.8    | 8.35             | 0.93   | 2.72   | 1.07   | 4.40   | 3.5    | 0.09            |
| NH <sub>4</sub> <sup>+</sup> -N (µM)       | 448.6          | 386.4  | 420.0  | 390.7  | 407.1  | 410.6  | 977.1            | 957.1  | 1093.6 | 1040.0 | 1175.0 | 1048.6 | <b>&lt;0.01</b> |
| DIN (µM)                                   | 512.2          | 433.0  | 449.3  | 393.9  | 1148.1 | 587.3  | 924.2            | 978.8  | 1130.9 | 1059.4 | 1302.8 | 1079.2 | <b>0.01</b>     |
| PO <sub>4</sub> <sup>3-</sup> -P (µM)      | 18.42          | 25.22  | 36.19  | 27.56  | 92.84  | 40.1   | 43.64            | 22.33  | 50.6   | 26.76  | 101.09 | 48.9   | 0.66            |
| N:P                                        | 27.80          | 17.17  | 12.42  | 14.29  | 12.37  | 16.8   | 21.18            | 43.828 | 22.35  | 39.60  | 12.89  | 28.0   | 0.13            |
| <b>Sediment</b>                            |                |        |        |        |        |        |                  |        |        |        |        |        |                 |
| Grain size (µm)                            | 41.55          | 63.565 | 51.795 | 55.37  | 59.40  | 55.3   | 472.6            | 339.3  | 293.0  | 313.0  | 154.0  | 314.4  | <b>&lt;0.01</b> |
| TOC (%)                                    | 1.13           | 0.84   | 2.48   | 0.47   | 0.11   | 1.0    | 1.32             | 0.812  | 0.94   | 1.23   | 1.91   | 1.2    | 0.61            |
| TON (%)                                    | 0.10           | 0.09   | 0.42   | 0.09   | 0.08   | 0.2    | 0.13             | 0.10   | 0.08   | 0.09   | 0.16   | 0.1    | 0.53            |
| TOC:TON                                    | 10.94          | 9.63   | 5.94   | 4.98   | 1.42   | 6.6    | 10.30            | 8.41   | 12.46  | 13.37  | 12.14  | 11.3   | <b>0.04</b>     |
| Pb (mg kg <sup>-1</sup> )                  | 11.37          | 7.79   | 6.03   | 6.45   | 4.93   | 7.3    | 4.18             | 1.74   | 3.38   | 3.19   | 3.12   | 3.1    | <b>&lt;0.01</b> |
| Cr (mg kg <sup>-1</sup> )                  | 8.58           | 5.53   | 4.52   | 4.89   | 3.80   | 5.5    | 2.96             | 1.23   | 2.68   | 2.37   | 2.27   | 2.3    | <b>&lt;0.01</b> |
| Mn (mg kg <sup>-1</sup> )                  | 166.1          | 107.8  | 68.0   | 96.4   | 58.4   | 99.3   | 80.8             | 40.80  | 50.4   | 59.2   | 50.6   | 56.4   | 0.07            |
| Fe (mg kg <sup>-1</sup> )                  | 6617.5         | 4701.0 | 3533.7 | 4026.6 | 3035.6 | 4382.9 | 2720.2           | 1418.0 | 2404.4 | 2218.6 | 2205.8 | 2193.4 | <b>0.01</b>     |
| Co (mg kg <sup>-1</sup> )                  | 4.64           | 3.22   | 2.36   | 2.63   | 2.00   | 3.0    | 1.51             | 0.61   | 1.28   | 1.18   | 1.22   | 1.2    | <b>&lt;0.01</b> |
| Ni (mg kg <sup>-1</sup> )                  | 9.34           | 6.35   | 4.86   | 5.52   | 4.08   | 6.0    | 3.42             | 1.17   | 2.65   | 2.27   | 2.49   | 2.4    | <b>&lt;0.01</b> |
| Cu (mg kg <sup>-1</sup> )                  | 8.97           | 6.79   | 5.40   | 5.20   | 4.31   | 6.1    | 3.37             | 1.26   | 2.89   | 2.59   | 2.44   | 2.5    | <b>&lt;0.01</b> |
| Zn (mg kg <sup>-1</sup> )                  | 26.41          | 19.30  | 15.12  | 14.32  | 11.76  | 17.4   | 9.38             | 3.16   | 7.99   | 6.86   | 18.76  | 9.2    | 0.06            |
| As (mg kg <sup>-1</sup> )                  | 2.52           | 1.82   | 1.41   | 1.73   | 1.48   | 1.8    | 1.58             | 0.60   | 0.85   | 0.81   | 1.29   | 1.0    | <b>0.02</b>     |
| Cd (mg kg <sup>-1</sup> )                  | 1.66           | 0.17   | 0.17   | 0.11   | 0.12   | 0.45   | 0.06             | 0.02   | 0.05   | 0.04   | 0.05   | 0.04   | 0.22            |

The significant differences between vegetated and unvegetated sites ( $P < 0.05$ ) are highlighted in bold ( $t$ -test,  $n = 5$ ).

**Table S2.** Spearman's rank correlations between relative abundance of dominant *nifH* T-RFs and environmental variables measured in this study ( $n = 10$ ). The corresponding OTUs in clone libraries and their phylogenetic affiliations are also provided.

| T-RF length (bp)                 | 44/45                 |                 | 61 - 63      |             | 151/152                 |             | 175/177/178          |          | 183                | 356/358             |          |      |
|----------------------------------|-----------------------|-----------------|--------------|-------------|-------------------------|-------------|----------------------|----------|--------------------|---------------------|----------|------|
| Corresponding                    | SL1                   |                 | Unidentified |             | SL2, SL4                |             | SL4                  |          | SL3                | SL2                 |          |      |
| OUT                              | <i>Geobacteraceae</i> |                 | Unclassified |             | <i>Desulfobulbaceae</i> |             | <i>Desulfobulbus</i> |          | <i>Pseudomonas</i> | <i>Desulfocapsa</i> |          |      |
| Classification                   |                       |                 |              |             |                         |             | -related             |          | -related           | -related            |          |      |
|                                  | <i>P</i>              | <i>P</i>        | <i>P</i>     | <i>P</i>    | <i>P</i>                | <i>P</i>    | <i>P</i>             | <i>P</i> | <i>P</i>           | <i>P</i>            | <i>P</i> |      |
| DO                               | -0.34                 | 0.34            | 0.37         | 0.29        | 0.11                    | 0.76        | 0.22                 | 0.54     | -0.09              | 0.80                | 0.29     | 0.42 |
| Salinity                         | 0.00                  | 1.00            | 0.14         | 0.70        | 0.02                    | 0.96        | -0.31                | 0.39     | 0.01               | 0.97                | -0.04    | 0.91 |
| Temperature                      | 0.16                  | 0.65            | -0.20        | 0.59        | 0.32                    | 0.36        | 0.48                 | 0.16     | 0.05               | 0.88                | 0.29     | 0.41 |
| Chl- <i>a</i>                    | <b>0.62</b>           | <b>0.05</b>     | -0.42        | 0.23        | 0.45                    | 0.19        | 0.07                 | 0.85     | -0.02              | 0.96                | -0.09    | 0.80 |
| pH                               | 0.18                  | 0.61            | -0.21        | 0.55        | 0.45                    | 0.19        | 0.57                 | 0.08     | 0.20               | 0.58                | 0.41     | 0.23 |
| NO <sub>3</sub> <sup>-</sup> -N  | 0.24                  | 0.51            | -0.39        | 0.26        | 0.30                    | 0.40        | 0.20                 | 0.58     | 0.45               | 0.19                | -0.09    | 0.80 |
| NO <sub>2</sub> <sup>-</sup> -N  | -0.05                 | 0.88            | -0.20        | 0.58        | -0.09                   | 0.80        | 0.06                 | 0.88     | 0.26               | 0.47                | 0.10     | 0.78 |
| NH <sub>4</sub> <sup>+</sup> -N  | -0.55                 | 0.10            | 0.39         | 0.26        | -0.61                   | 0.06        | -0.30                | 0.40     | -0.22              | 0.53                | -0.03    | 0.93 |
| DIN                              | -0.30                 | 0.40            | 0.28         | 0.43        | -0.35                   | 0.33        | -0.19                | 0.59     | -0.03              | 0.93                | -0.26    | 0.47 |
| PO <sub>4</sub> <sup>3-</sup> -P | 0.31                  | 0.38            | -0.25        | 0.49        | 0.03                    | 0.93        | -0.14                | 0.69     | 0.20               | 0.58                | -0.04    | 0.91 |
| N:P                              | <b>-0.62</b>          | <b>0.05</b>     | 0.42         | 0.23        | -0.42                   | 0.23        | -0.02                | 0.96     | -0.24              | 0.51                | 0.02     | 0.96 |
| Grain size                       | -0.12                 | 0.75            | -0.15        | 0.68        | -0.03                   | 0.93        | 0.24                 | 0.50     | 0.47               | 0.17                | 0.39     | 0.26 |
| TOC                              | -0.35                 | 0.33            | 0.09         | 0.80        | -0.18                   | 0.63        | -0.04                | 0.90     | -0.10              | 0.78                | 0.27     | 0.45 |
| TON                              | 0.08                  | 0.83            | -0.13        | 0.73        | -0.04                   | 0.91        | 0.09                 | 0.81     | 0.10               | 0.78                | 0.47     | 0.17 |
| TOC:TON                          | <b>-0.88</b>          | <b>&lt;0.01</b> | <b>0.67</b>  | <b>0.03</b> | <b>-0.68</b>            | <b>0.03</b> | -0.44                | 0.21     | -0.41              | 0.24                | -0.24    | 0.51 |
| Pb                               | 0.12                  | 0.75            | -0.05        | 0.88        | 0.15                    | 0.68        | -0.11                | 0.76     | -0.18              | 0.63                | -0.33    | 0.35 |
| Cr                               | 0.12                  | 0.75            | -0.05        | 0.88        | 0.15                    | 0.68        | -0.11                | 0.76     | -0.18              | 0.63                | -0.33    | 0.35 |
| Mn                               | -0.01                 | 0.99            | 0.01         | 0.99        | -0.02                   | 0.96        | -0.23                | 0.52     | -0.12              | 0.75                | -0.25    | 0.49 |
| Fe                               | 0.12                  | 0.75            | -0.05        | 0.88        | 0.15                    | 0.68        | -0.11                | 0.76     | -0.18              | 0.63                | -0.33    | 0.35 |
| Co                               | 0.14                  | 0.70            | -0.04        | 0.91        | -0.04                   | 0.91        | -0.11                | 0.76     | -0.13              | 0.73                | -0.30    | 0.40 |
| Ni                               | 0.14                  | 0.70            | -0.04        | 0.91        | 0.14                    | 0.70        | -0.11                | 0.76     | -0.13              | 0.73                | -0.30    | 0.40 |
| Cu                               | 0.09                  | 0.80            | -0.08        | 0.83        | 0.21                    | 0.56        | -0.03                | 0.93     | -0.16              | 0.65                | -0.28    | 0.43 |
| Zn                               | -0.09                 | 0.80            | 0.27         | 0.45        | -0.08                   | 0.83        | -0.24                | 0.50     | -0.10              | 0.78                | -0.22    | 0.53 |
| As                               | 0.13                  | 0.73            | -0.04        | 0.91        | 0.02                    | 0.96        | -0.19                | 0.59     | 0.03               | 0.93                | -0.30    | 0.40 |
| Cd                               | 0.12                  | 0.75            | -0.05        | 0.88        | 0.21                    | 0.56        | -0.02                | 0.96     | -0.04              | 0.91                | -0.26    | 0.47 |

The significant differences ( $P < 0.05$ ) are highlighted in bold.

DO = dissolved oxygen; Chl-*a* = chlorophyll *a*; DIN = dissolved inorganic nitrogen; N:P = ratio of DIN to PO<sub>4</sub><sup>3-</sup>-P; TOC = total organic carbon; TON = total organic nitrogen.

**Table S3.** Summary of Ion Torrent Sequencing of bacterial communities and alpha diversities in vegetated (V1-3) and unvegetated sediments (U1-3) of Swan Lake

| Sample ID | No. of raw reads | No. of reads after quality filtering | No. of reads after removing the unaligned, chimeras, and singletons | No. of reads after removing non-bacteria | No. of reads assigned to Chloroplast | No. of OTUs (per 1813 reads) | Shannon (per 1813 reads) | Chao1 (per 1813 reads) |
|-----------|------------------|--------------------------------------|---------------------------------------------------------------------|------------------------------------------|--------------------------------------|------------------------------|--------------------------|------------------------|
| V1        | 9326             | 5241                                 | 4184                                                                | 4144                                     | 257                                  | 430                          | 6.77                     | 783                    |
| V2        | 8916             | 4427                                 | 3397                                                                | 3350                                     | 53                                   | 507                          | 7.33                     | 912                    |
| V3        | 10195            | 3648                                 | 2855                                                                | 2811                                     | 78                                   | 534                          | 7.46                     | 1016                   |
| U1        | 7965             | 2445                                 | 1878                                                                | 1859                                     | 46                                   | 511                          | 7.49                     | 960                    |
| U2        | 4326             | 4326                                 | 3199                                                                | 3166                                     | 33                                   | 490                          | 7.19                     | 904                    |
| U3        | 5709             | 3823                                 | 2611                                                                | 2585                                     | 39                                   | 502                          | 7.03                     | 921                    |

## REFERENCES

- Fulweiler RW, Brown SM, Nixon SW, Jenkins BD.** 2013. Evidence and a conceptual model for the co-occurrence of nitrogen fixation and denitrification in heterotrophic marine sediments. *Mar. Ecol. Prog. Ser.* **482**:57–68.
- Brown SM, Jenkins BD.** 2014. Profiling gene expression to distinguish the likely active diazotrophs from a sea of genetic potential in marine sediments. *Environ. Microbiol.* **16**:3128–3142.
